# Supplementary material for: Long-Term Alterations in Motor Skills, Neurogenesis and Astrocyte Numbers following Transient Cerebral Ischemia in Mice
Source: MDPI journal article supplement (doi:10.3390/medicina60040658), 2024-04-19
Supplement: s1 [file s1]

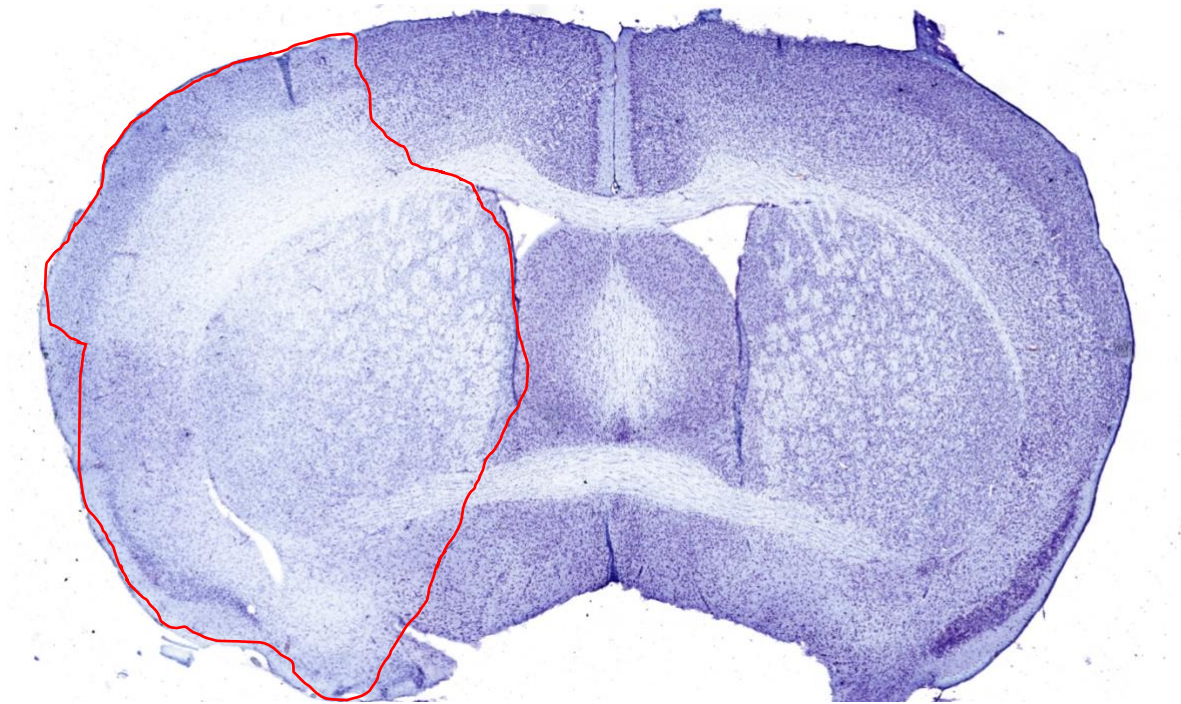

Supplemental Figure S1. **Microphotograph showing the staining of Nissl bodies in the corpus striatum of fMCAo group mice brain.** Red line indicates the lesioned area. Image was taken using Panoramic Midi Scanner using 2X magnification.
